# Supplementary material for: Meta-Analysis of Stenting versus Non-Stenting for the Treatment of Ureteral Stones
Source: PubMed Central journal article supplement (PMC5221881; doi:10.1371/journal.pone.0167670), 2017-01-09

$$z_i = \frac{y_i}{\sqrt{v_i + \tau^2}}$$

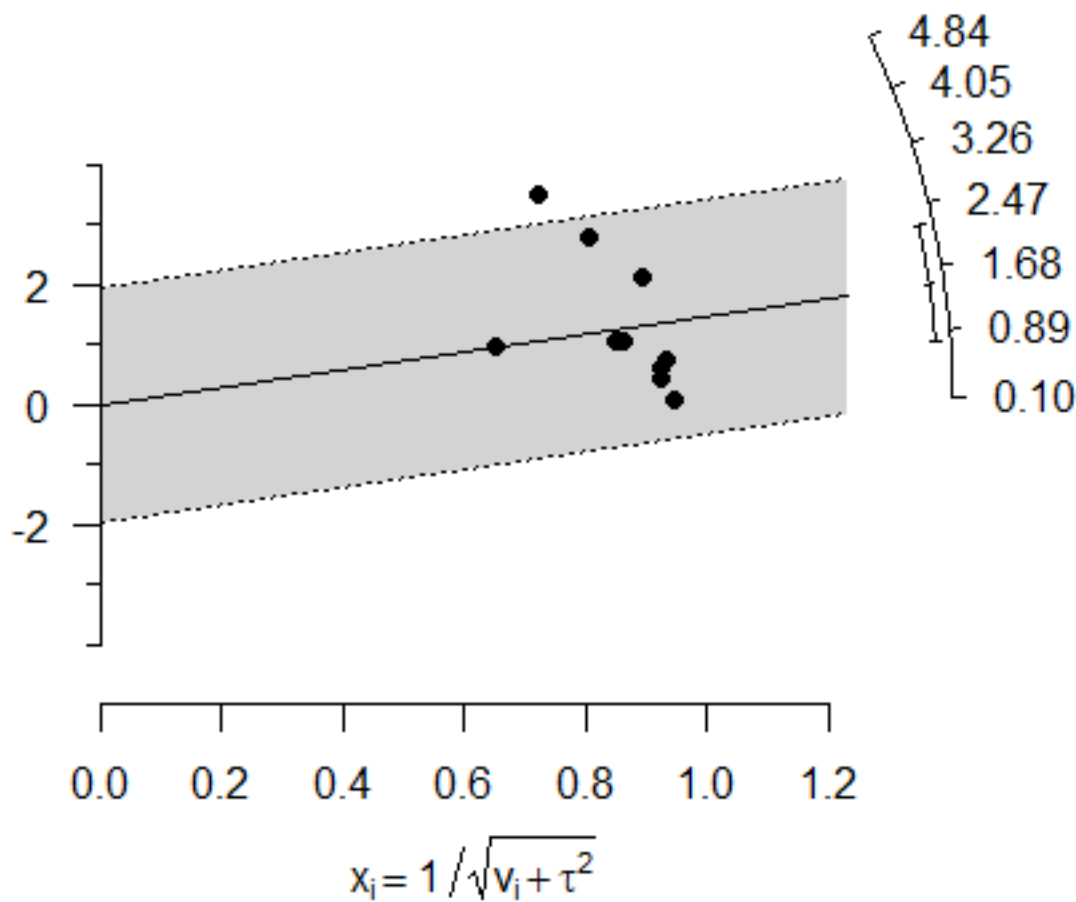

Supplement: pone.0167670.s008.pdf [file pone.0167670.s008.pdf]
