# Supplementary material for: Meta-Analysis of Stenting versus Non-Stenting for the Treatment of Ureteral Stones
Source: PubMed Central journal article supplement (PMC5221881; doi:10.1371/journal.pone.0167670), 2017-01-09
Supplement: pone.0167670.s013.pdf [file pone.0167670.s013.pdf]

$$z_i = \frac{y_i}{\sqrt{v_i}}$$

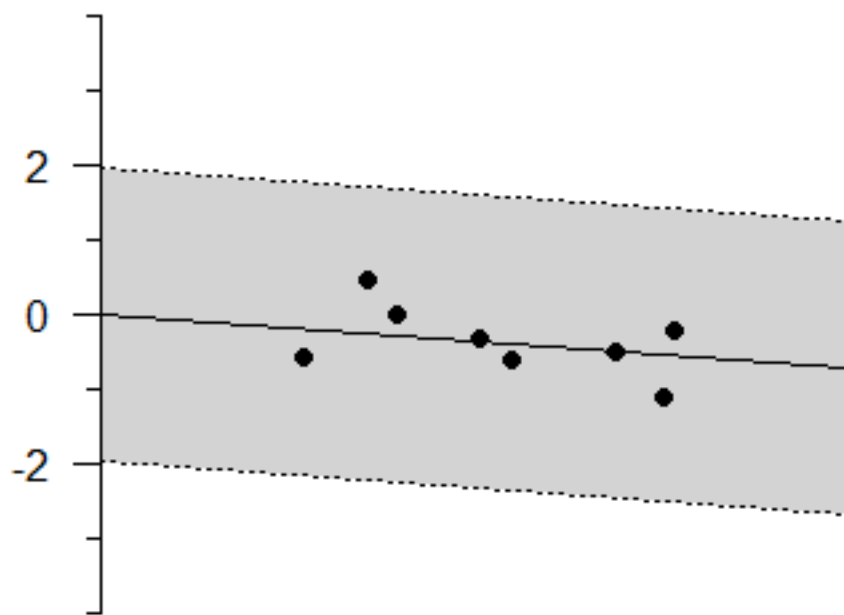

0.0 0.5 1.0 1.5 2.0 2.5

$$x_i = 1/\sqrt{v_i}$$

0.44  
0.25  
0.05  
-0.14  
-0.34  
-0.53  
-0.73
