# Supplementary material for: Meta-Analysis of Stenting versus Non-Stenting for the Treatment of Ureteral Stones
Source: PubMed Central journal article supplement (PMC5221881; doi:10.1371/journal.pone.0167670), 2017-01-09

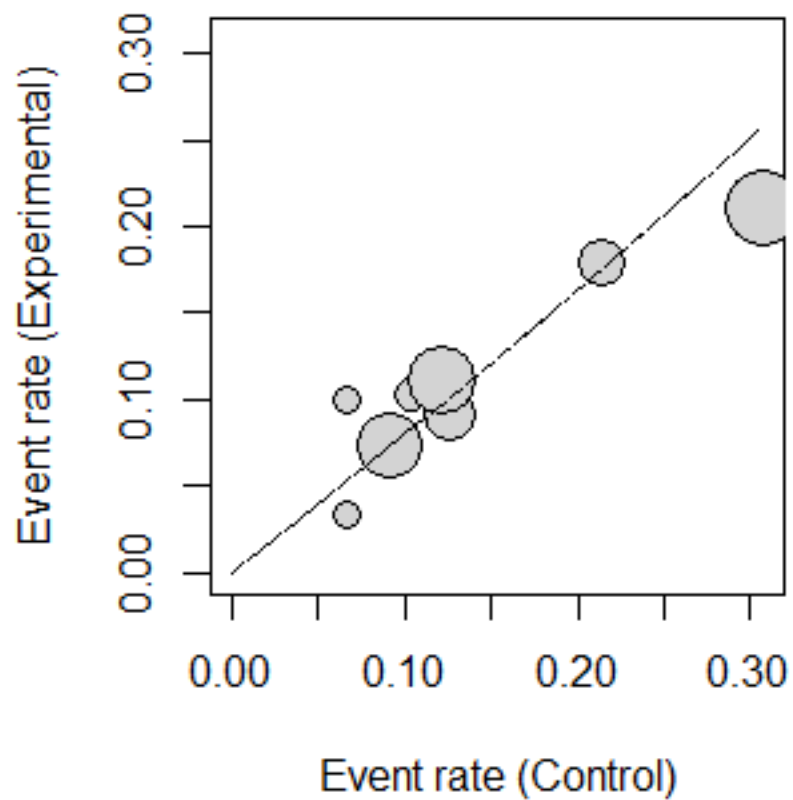

Supplement: pone.0167670.s022.pdf [file pone.0167670.s022.pdf]
